# Supplementary material for: Investigation of Drug-Interaction Potential for Arthritis Dietary Supplements: Chondroitin Sulfate, Glucosamine, and Methylsulfonylmethane
Source: MDPI journal article supplement (doi:10.3390/molecules28248068), 2023-12-13
Supplement: s1 [file s1]

# Investigation of Drug-Interaction Potential for Arthritis Dietary Supplements: Chondroitin Sulfate, Glucosamine, and Methylsulfonylmethane

Su Min Kim <sup>1,†</sup>, So Young Jo <sup>1,†</sup>, Ho-Young Park <sup>2</sup>, Yu Ra Lee <sup>2</sup>, Jun Sang Yu <sup>1,\*</sup> and Hye Hyun Yoo <sup>1,\*</sup>

<sup>1</sup> Institute of Pharmaceutical Science and Technology, College of Pharmacy, Hanyang University, Ansan 15588, Republic of Korea; ksm990201@naver.com (S.M.K.); sjo7909@gmail.com (S.Y.J.)

<sup>2</sup> Food Functionality Research Division, Korea Food Research Institute, Wanju-gun 55365, Republic of Korea; hypark@kfri.re.kr (H.-Y.P.); lyr@kfri.re.kr (Y.R.L.)

\* Correspondence: [xat007@hanyang.ac.kr](mailto:xat007@hanyang.ac.kr) (J.S.Y.); [yooohh@hanyang.ac.kr](mailto:yooohh@hanyang.ac.kr) (H.H.Y.); Tel.: +82-31-400-4783 (J.S.Y.); +82-31-400-5804 (H.H.Y.)

<sup>†</sup> These authors contributed equally to this work.

## Supporting Information

**Table S1.** The guideline recommendations for the most commonly used oral and topical pharmacological agents in OA treatment [1].

| Guideline Author | Year | Acetaminophen                                                                                                                     | Opioid Analgesics                                      |                                    | Peroral NSAIDs                                  | SYSADOA                                                                          | Topical NSAIDs                                                            |
|------------------|------|-----------------------------------------------------------------------------------------------------------------------------------|--------------------------------------------------------|------------------------------------|-------------------------------------------------|----------------------------------------------------------------------------------|---------------------------------------------------------------------------|
|                  |      |                                                                                                                                   | Tramadol                                               | Other                              |                                                 |                                                                                  |                                                                           |
| AAOS             | 2013 | Unable to give any recommendation                                                                                                 | Positive recommendation                                | Inconclusive                       | Positive recommendation                         | Strong recommendation against use                                                | Positive recommendation                                                   |
| ACR/AF           | 2020 | Conditional recommendation for                                                                                                    | Conditional Recommendation for                         | Conditional recommendation against | Recommended as first-line treatment             | Strong recommendation against use                                                | Strong recommendation for use prior to oral NSAIDs                        |
| OARSI            | 2019 | Conditional recommendation for                                                                                                    | Strong recommendation against                          |                                    | Recommended as first-line treatment             | Not included                                                                     | Recommended as first-line treatment                                       |
| ESCEO            | 2019 | Weak recommendation against as single therapy, should be used as rescue medicine in addition to first-line treatment with SYSADOA | Conditional recommendation for as third-line treatment |                                    | Recommended as first-line, short-term treatment | Recommended as first-line, long-term treatment for pharmaceutical-grade products | Recommended in addition to SYSADOA and acetaminophen prior to oral NSAIDs |

**Note:** AAOS-American Academy of Orthopedic Surgeons; ACR/AF-American College of Rheumatology/Arthritis Foundation; OARSI-Osteoarthritis Research Society International; ESCEO-European Society for Clinical and Economic Aspects of Osteoporosis, Osteoarthritis and Musculoskeletal Diseases;

**Table S2.** Linearity data of probe metabolites (n=3).

| Metabolites                 | Concentration (%) |         |              |         |              |         |              |         |              |         |              |         |
|-----------------------------|-------------------|---------|--------------|---------|--------------|---------|--------------|---------|--------------|---------|--------------|---------|
|                             | 2.0               |         | 5.0          |         | 10.0         |         | 20.0         |         | 50.0         |         | 100.0        |         |
|                             | Accuracy (%)      | RSD (%) | Accuracy (%) | RSD (%) | Accuracy (%) | RSD (%) | Accuracy (%) | RSD (%) | Accuracy (%) | RSD (%) | Accuracy (%) | RSD (%) |
| Acetaminophen               | 96.48             | 2.26    | 100.80       | 2.82    | 99.32        | 1.73    | 100.70       | 0.92    | 104.30       | 4.28    | 98.03        | 0.45    |
| 7-OH-coumarin               | 100.33            | 6.67    | 103.56       | 4.74    | 92.71        | 2.51    | 94.66        | 3.28    | 102.87       | 2.84    | 105.86       | 7.05    |
| OH-bupropion                | 101.05            | 2.06    | 99.31        | 3.84    | 98.76        | 0.13    | 94.30        | 1.91    | 95.63        | 0.60    | 110.94       | 11.20   |
| Dextrorphan                 | 99.89             | 1.97    | 100.98       | 1.41    | 98.91        | 1.97    | 94.29        | 2.57    | 114.57       | 3.32    | 90.86        | 1.26    |
| 4-OH-diclofenac             | 101.95            | 5.31    | 96.87        | 5.84    | 97.21        | 1.33    | 97.73        | 1.28    | 97.98        | 2.92    | 108.26       | 9.24    |
| 4-OH-mephenytoin            | 101.52            | 11.62   | 96.18        | 1.66    | 101.39       | 2.83    | 95.84        | 3.39    | 102.21       | 3.00    | 102.85       | 7.39    |
| 1-OH-midazolam              | 98.44             | 3.90    | 105.08       | 13.14   | 99.32        | 1.11    | 97.12        | 3.51    | 97.67        | 1.26    | 102.38       | 4.70    |
| 6- $\beta$ -OH-Testosterone | 100.26            | 1.50    | 99.17        | 4.00    | 102.21       | 4.82    | 96.55        | 5.24    | 96.72        | 0.22    | 105.09       | 7.16    |

**Table S3.** Accuracy and precision data of probe metabolites intra-day, inter-day for LC-MS/MS validation.

| Metabolites                 | Intra-day (n=3) |        |        |         |      |      | Inter-day (3days, n=3/day) |        |        |         |      |      |
|-----------------------------|-----------------|--------|--------|---------|------|------|----------------------------|--------|--------|---------|------|------|
|                             | Accuracy (%)    |        |        | RSD (%) |      |      | Accuracy (%)               |        |        | RSD (%) |      |      |
|                             | LQC             | MQC    | HQC    | LQC     | MQC  | HQC  | LQC                        | MQC    | HQC    | LQC     | MQC  | HQC  |
| Acetaminophen               | 103.49          | 96.20  | 100.77 | 2.98    | 0.84 | 0.72 | 98.44                      | 93.52  | 97.70  | 4.31    | 3.56 | 0.33 |
| 7-OH-coumarin               | 105.02          | 96.05  | 94.60  | 4.19    | 1.83 | 3.63 | 104.29                     | 97.75  | 91.10  | 3.02    | 1.54 | 0.79 |
| OH-bupropion                | 100.47          | 99.45  | 103.53 | 3.57    | 0.41 | 1.77 | 100.97                     | 100.09 | 102.51 | 0.56    | 1.28 | 0.96 |
| Dextrorphan                 | 90.24           | 104.97 | 88.12  | 0.79    | 1.76 | 0.49 | 95.01                      | 101.70 | 90.30  | 0.85    | 4.13 | 0.07 |
| 4-OH-diclofenac             | 100.77          | 96.69  | 100.25 | 2.83    | 0.71 | 0.46 | 102.12                     | 99.68  | 98.16  | 1.09    | 0.84 | 1.15 |
| 4-OH-mephenytoin            | 100.50          | 88.47  | 90.11  | 8.26    | 1.87 | 1.37 | 101.86                     | 89.22  | 96.56  | 2.35    | 0.60 | 2.62 |
| 1-OH-midazolam              | 98.90           | 96.34  | 93.70  | 0.07    | 1.77 | 1.86 | 101.48                     | 100.37 | 91.74  | 2.79    | 4.13 | 0.28 |
| 6- $\beta$ -OH-Testosterone | 106.15          | 95.93  | 93.62  | 10.98   | 3.69 | 1.95 | 103.74                     | 97.03  | 92.47  | 2.35    | 3.35 | 1.37 |

LQC-low quality control; MQC-medium quality control; HQC-high quality control.

**Table S4.** Precursor-product ion pairs of CYP-specific metabolites for multiple reaction monitoring.

| P450 isozyme | Metabolites monitored       | Precursor ion | Product ion |
|--------------|-----------------------------|---------------|-------------|
| CYP 1A2      | Acetaminophen               | 152.1         | 110.1       |
| CYP 2A6      | 7-OH-coumarin               | 162.9         | 106.9       |
| CYP 2B6      | OH-bupropion                | 256.2         | 238.2       |
| CYP 2D6      | Dextrorphan                 | 258.2         | 157.1       |
| CYP 2C9      | 4-OH-diclofenac             | 312.2         | 230.9       |
| CYP 2C19     | 4-OH-mephenytoin            | 235.0         | 150.1       |
| CYP 3A4      | 1-OH-midazolam              | 343.1         | 325.1       |
| CYP 3A4      | 6- $\beta$ -OH-testosterone | 305.2         | 269.2       |

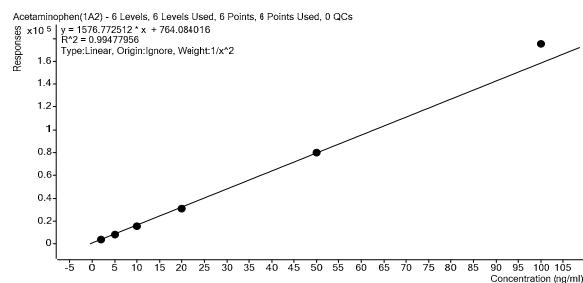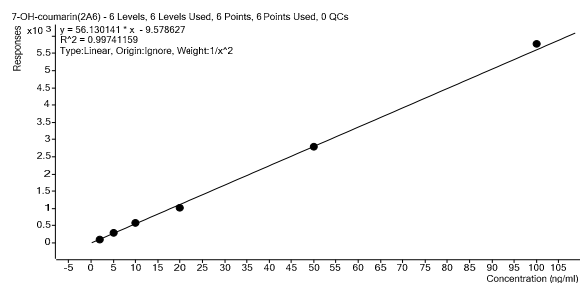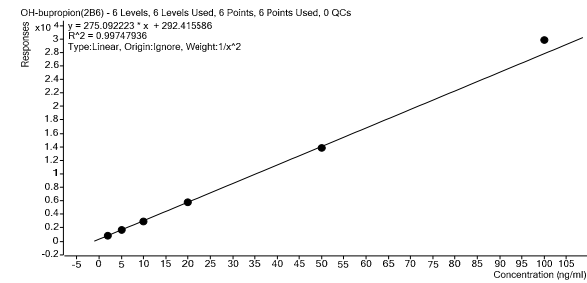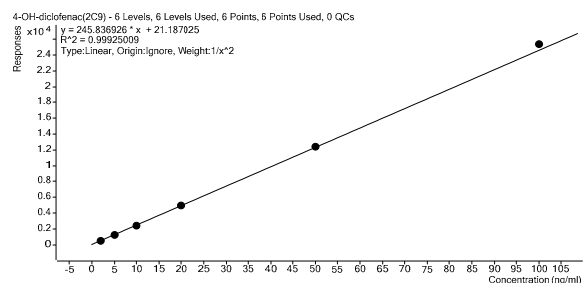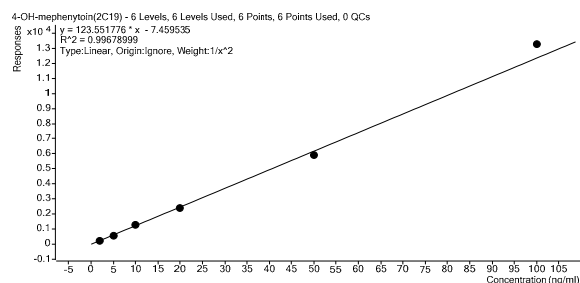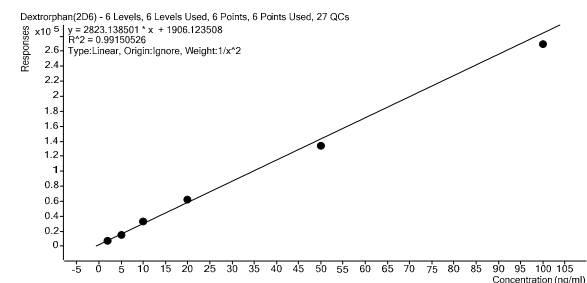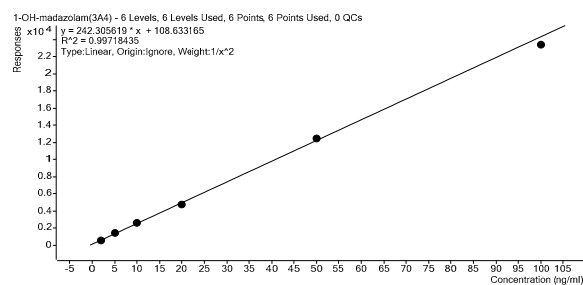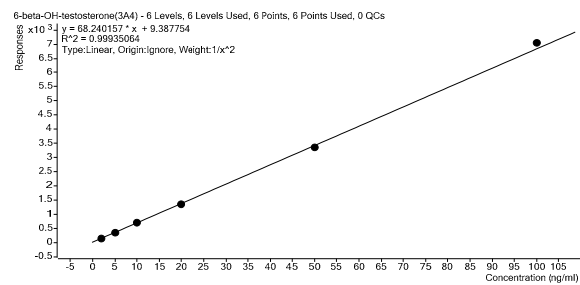

**Figure S1.** Calibration curves of probe metabolites.

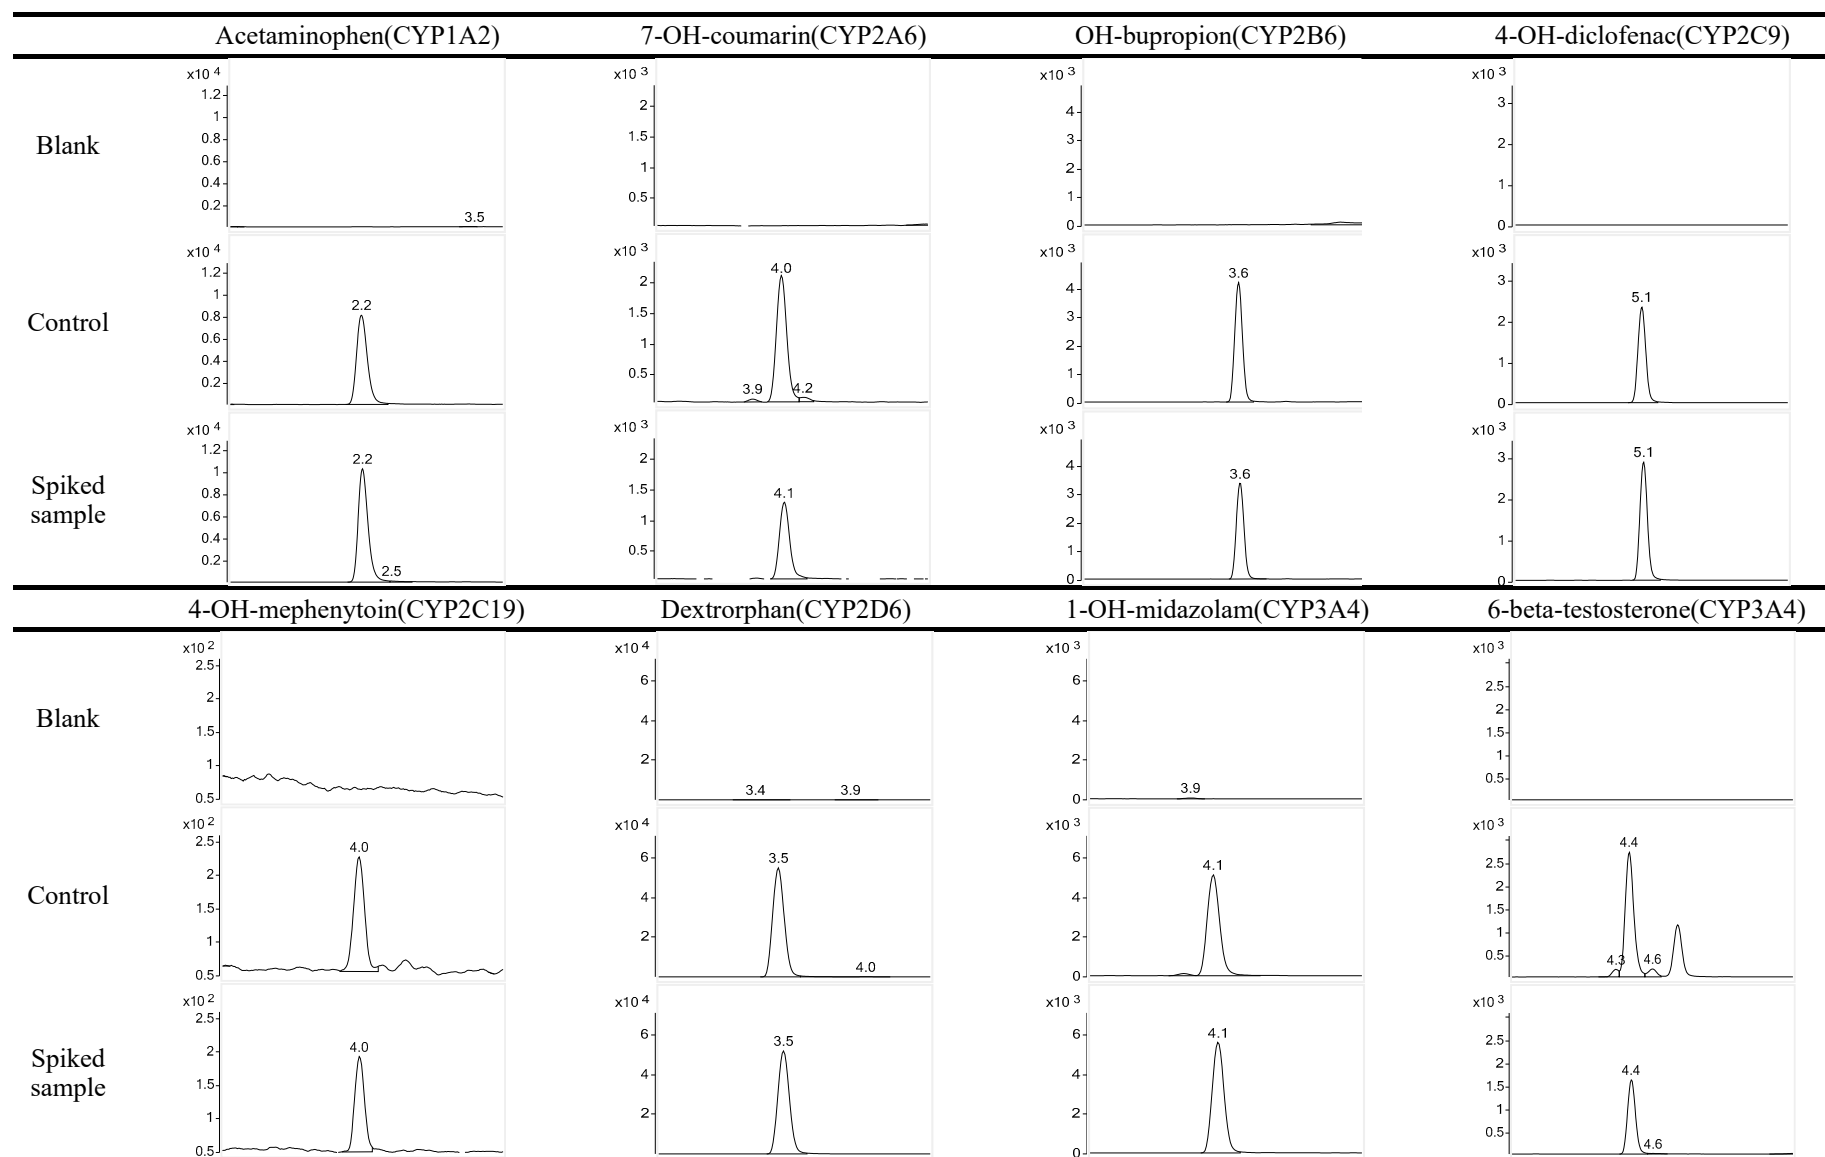

**Figure S2.** Chromatograms data of probe metabolites for selectivity. Blank, control, spiked sample of medium quality control.

## References

1. Primorac, D.; Molnar, V.; Maticic, V.; Hudetz, D.; Jelec, Z.; Rod, E.; Cukelj, F.; Vidovic, D.; Vrdoljak, T.; Dobricic, B.; Anticevic, D.; Smolic, M.; Miskulin, M.; Cacic, D.; Boric, I., Comprehensive Review of Knee Osteoarthritis Pharmacological Treatment and the Latest Professional Societies' Guidelines. *Pharmaceuticals-Base* **2021**, 14, (3).
